# Supplementary material
Source: PubMed Central journal article supplement (PMC6442955)
Supplement: 2018_201350-Disclosures_and_Contributions.pdf [file 2018_201350-Disclosures_and_Contributions.pdf]

Haematologica  
HAEMATOL/2018/201350  
Version 3

Clinical presentation determines selection of patients for initial  
observation in mantle cell lymphoma

Anita Kumar, Zhitao Ying, Anna Alperovich, Ahmet Dogan, Paul  
Hamlin, Craig Moskowitz, Janine Pichardo, Carol Portlock, Fushen  
Sha, Andrew D. Zelenetz, Zhigang Zhang, Esther Drill, Kaitlin Woo, and  
Anas Younes

Disclosures: 1) This research was funded in part through the NIH/NCI Cancer Center Support Grant P30 CA008748. 2) Anita Kumar: research funding from Abbvie Pharmaceuticals, Adaptive Biotechnologies, Celgene, Pharmacyclics, Seattle Genetics; advisory board member for Celgene (April 2016). Zhitao Ying: none. Anna Alperovich: none. Ahmet Dogan: consultancy at Novartis, Weill-Cornell Hospital, Celgene, Seattle Genetics, Guidepoint Global Advisors, Pharmacyclics, Oncology Specialty Group, Roche, Peerview Institute, Physicians' Education Resource, Corvus Pharmaceuticals. Paul Hamlin: consultancy at Portola Pharmaceuticals, Celgene, Karyopharm, Juno Therapeutics; research funding from Portola, Molecular Templates, Incyte, J&J Pharmaceuticals. Craig Moskowitz: none. Janine Pichardo: none. Carol Portlock: none. Fushen Sha: none. Andrew D. Zelenetz: consultancy at Genentech/Roche, Gilead, Celgene, Janssen, Amgen, Novartis, Adaptive Biotechnology; research funding MEI Pharma, MorphoSys, Sandoz, Celgene, Roche, Gilead; Board of Directors (DMC Chair) Beigene. Zhigang Zhang: none. Esther Drill: none. Kaitlin Woo: none. Anas Younes: research funding from Novartis, J&J, Curis, Roche, BMS; Honoraria from Bayer, BMS, Celgene, Incyte, Janssen, Sanofi, Seattle Genetics, Takeda Millenium, Genentect, Merck. 3) n/a

Contributions: Anita Kumar: first author; contributed equally to work; designed and performed research, analyzed data; edit/writing of paper. Zhitao Ying: contributed equally to work; designed and performed research. Anna Alperovich: performed research and data collection. Ahmet Dogan: performed research, analyzed data. Paul Hamlin: designed and performed research, analyzed data; edit/writing of paper. Craig Moskowitz: designed research; writing of paper. Janine Pichardo: assistance with data input, tissue availability, and submitting lab requests. Carol Portlock: analyzed data; editing of paper. Fushen Sha: performed research; analyzed data. Andrew D. Zelenetz: contributed patients; contributed to analysis and writing of paper. Zhigang Zhang: statistical analysis. Esther Drill: analyzed data. Kaitlin Woo: analyzed data. Anas Younes: designed research, performed research, analyzed data; edit/writing of paper.
